# Supplementary material for: An approach to comparing tiling array and high throughput sequencing technologies for genomic transcript mapping
Source: PubMed Central journal article supplement (PMC2764720; doi:10.1186/1756-0500-2-150), 2009-07-24

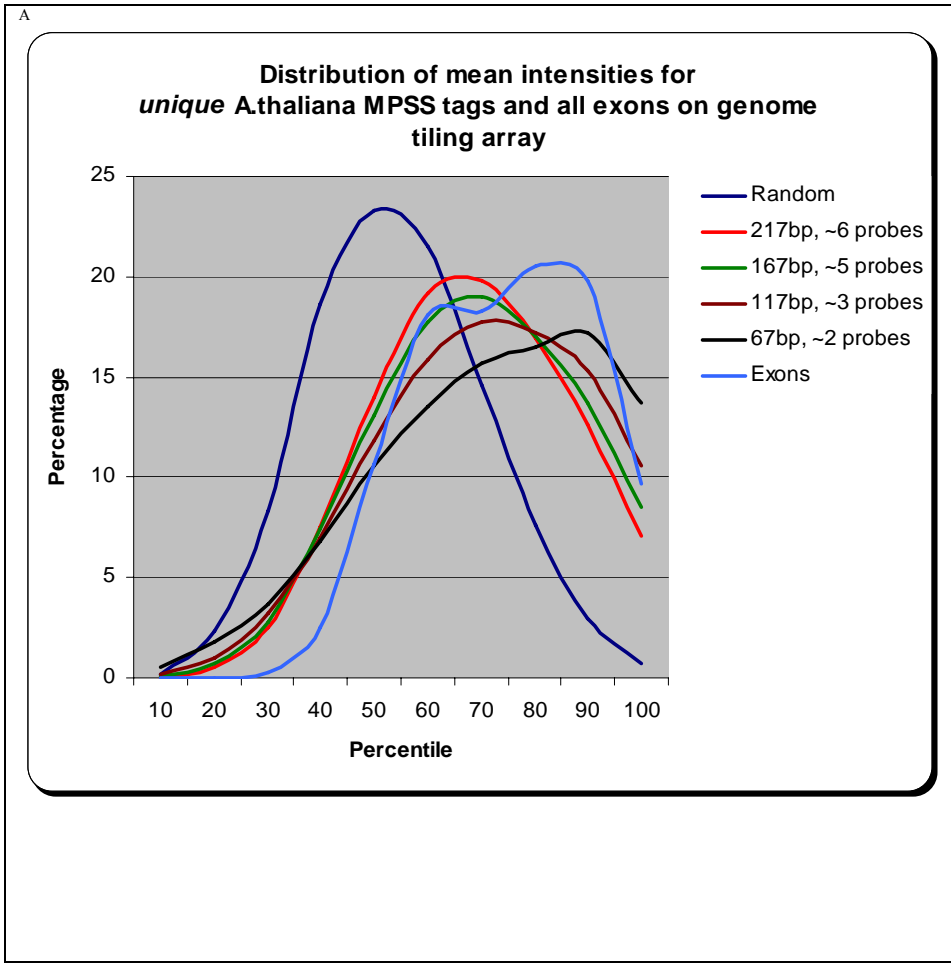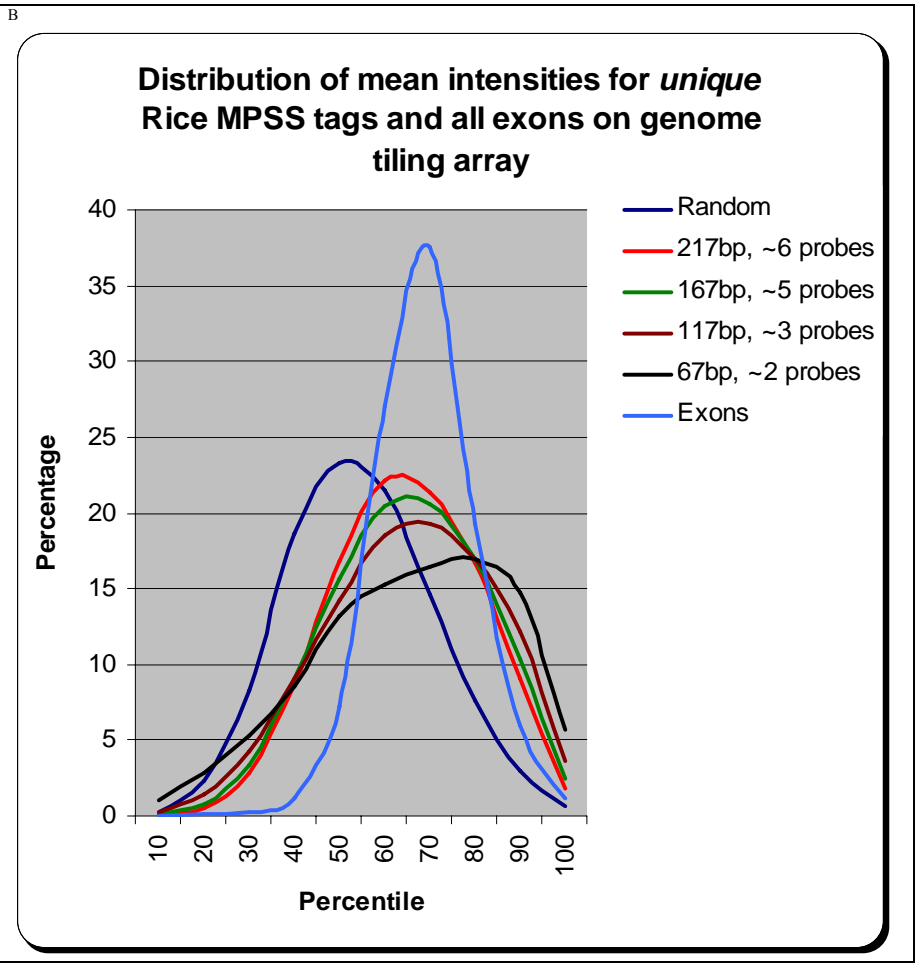

Supplement: 1756-0500-2-150-S3.pdf [file 1756-0500-2-150-S3.pdf]
